# Supplementary material for: Clinical features and outcomes of elderly patients with antineutrophil cytoplasmic antibody-positive vasculitis: a single-center retrospective study
Source: PubMed Central journal article supplement — Kidney Res Clin Pract. 2021 Nov 16;41(2):209–18. doi: 10.23876/j.krcp.21.008 (PMC8995490; doi:10.23876/j.krcp.21.008), 2021-11-16
Supplement: j-krcp-21-008suppl1.pdf [file j-krcp-21-008suppl1.pdf]

**Supplementary Table 1. Pathologic finding on kidney biopsy according to age groups**

| Characteristic             | Total <sup>a</sup> (n = 33) | Younger group (n = 17) | Elderly group (n = 16) | p-value |
|----------------------------|-----------------------------|------------------------|------------------------|---------|
| No. of glomeruli at biopsy | 17.0 (11.3–24.8)            | 17.0 (11.0–24.0)       | 17.0 (13.0–25.0)       | 0.37    |
| % Global sclerosis         | 32.0 (12.0–55.0)            | 32.5 (6.8–60.0)        | 23.0 (14.0–44.0)       | 0.83    |
| % Crescent                 | 27.5 (17.3–48.5)            | 21.0 (14.5–43.5)       | 31.0 (18.0–50.0)       | 0.31    |
| Necrosis                   | 8/24 (33.3)                 | 4/13 (30.8)            | 4/11 (36.5)            | 0.77    |
| Tubular atrophy            | 31/32 (96.9)                | 17/17 (100)            | 14/15 (93.3)           | 0.28    |
| Normal                     | 1/32 (6.7)                  | 0/17 (0)               | 1/15 (6.7)             | 0.27    |
| Mild                       | 5/32 (15.6)                 | 3/17 (17.6)            | 2/15 (13.3)            |         |
| Moderate                   | 11/32 (34.4)                | 8/17 (47.1)            | 3/15 (20.0)            |         |
| Severe                     | 15/32 (46.9)                | 6/17 (35.3)            | 9/15 (60.0)            |         |
| Interstitial inflammation  | 32/32 (100)                 | 17/17 (100)            | 15/15 (100)            |         |
| Normal <sup>b</sup>        | 0/21 (0)                    | 0/12 (0)               | 0/9 (0)                | 0.29    |
| Mild                       | 6/21 (28.6)                 | 4/12 (33.3)            | 2/9 (22.2)             |         |
| Moderate                   | 5/21 (23.8)                 | 4/12 (33.3)            | 1/9 (11.1)             |         |
| Severe                     | 10/21 (47.6)                | 4/12 (33.3)            | 6/9 (66.7)             |         |
| Interstitial fibrosis      | 23/32 (71.9)                | 13/17 (76.5)           | 10/15 (66.7)           | 0.54    |
| Normal                     | 9/24 (37.5)                 | 4/14 (28.6)            | 5/10 (50.0)            | 0.72    |
| Mild                       | 5/24 (20.8)                 | 3/14 (21.4)            | 2/10 (20.0)            |         |
| Moderate                   | 4/24 (16.7)                 | 3/14 (21.4)            | 1/10 (10.0)            |         |
| Severe                     | 6/24 (25.0)                 | 4/14 (28.6)            | 2/10 (20.0)            |         |
| Vascular abnormality       | 18/33 (54.5)                | 9/17 (52.9)            | 9/15 (60.0)            | 0.69    |

Data are expressed as median (interquartile range) or number (%). Younger group, aged <65 years; elderly group, aged ≥65 years.

<sup>a</sup>Only 33 patients underwent kidney biopsies, <sup>b</sup>Information regarding interstitial inflammation and interstitial fibrosis severity were available in only 21 and 24 patients, respectively.
