# Supplementary material for: Clinical features and outcomes of elderly patients with antineutrophil cytoplasmic antibody-positive vasculitis: a single-center retrospective study
Source: PubMed Central journal article supplement — Kidney Res Clin Pract. 2021 Nov 16;41(2):209–18. doi: 10.23876/j.krcp.21.008 (PMC8995490; doi:10.23876/j.krcp.21.008), 2021-11-16
Supplement: j-krcp-21-008suppl2.pdf [file j-krcp-21-008suppl2.pdf]

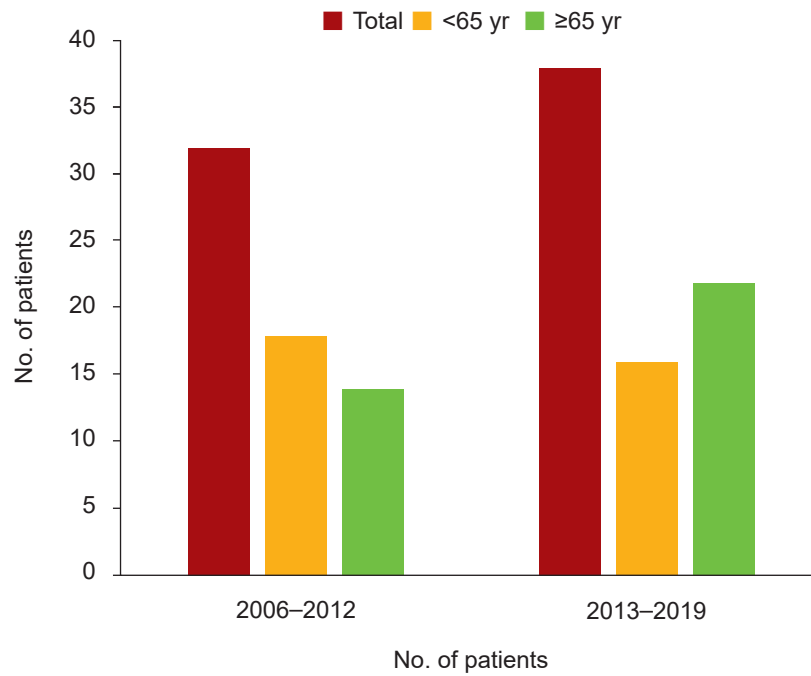

**Supplementary Figure 1. The number of patients at the time of diagnosis according to age groups.** More patients were diagnosed with antineutrophil cytoplasmic autoantibody-associated vasculitis between 2013 and 2019 than between 2006 and 2012, and more of these patients were elderly.
