# Supplementary material for: Clinical features and outcomes of elderly patients with antineutrophil cytoplasmic antibody-positive vasculitis: a single-center retrospective study
Source: PubMed Central journal article supplement — Kidney Res Clin Pract. 2021 Nov 16;41(2):209–18. doi: 10.23876/j.krcp.21.008 (PMC8995490; doi:10.23876/j.krcp.21.008), 2021-11-16
Supplement: j-krcp-21-008suppl3.pdf [file j-krcp-21-008suppl3.pdf]

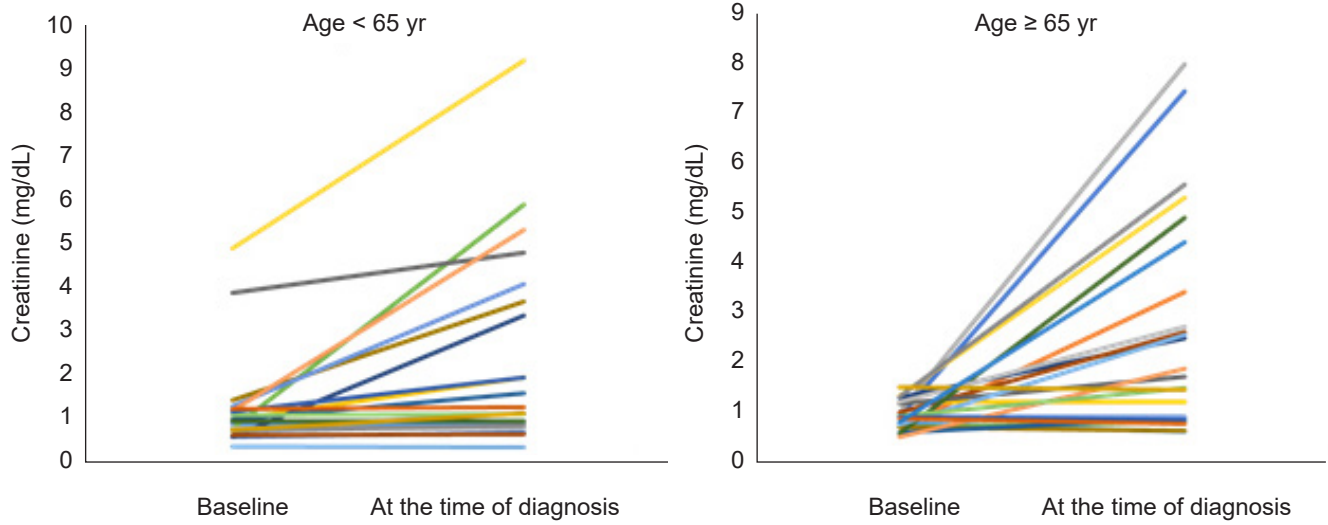

**Supplementary Figure 2.** Level of serum creatinine creatinine between baseline and the time of diagnosis according to age group.
